# Supplementary material for: Sareomycetes cl. nov.: A new proposal for placement of the resinicolous genus Sarea (Ascomycota, Pezizomycotina)
Source: PubMed Central journal article supplement — Fungal Syst Evol. 2020 Feb 14;6:25–37. doi: 10.3114/fuse.2020.06.02 (PMC7451776; doi:10.3114/fuse.2020.06.02), 2020-02-14
Supplement: SF1.pdf [file SF1.pdf]

Table S1

List of taxa used in this study with GenBank accession numbers and voucher information

|                                  | Collection /Strain number | GenBank accession number |                                         |                                        |          |          |            |              |
|----------------------------------|---------------------------|--------------------------|-----------------------------------------|----------------------------------------|----------|----------|------------|--------------|
|                                  |                           | ITS                      | mtSSU                                   | nuLSU                                  | nuSSU    | RPB1     | RPB2       | MCM7         |
| <i>Acarospora laqueata</i>       | Westberg 10-170 (S)       | DQ842014                 | DQ991757                                | AY640943                               | AY640984 | DQ782860 | —          | JX000147     |
| <i>Acarospora schleicheri</i>    | Obermayer 2929 (UPS)      | HQ650721                 | AY584694                                | AY640945                               | AY640986 | DQ782859 | —          | JX000148     |
| <i>Acarosporina microspora</i>   |                           | DQ782834                 | AY584612                                | AY584643                               | AY584667 | DQ782818 | AY584682   | —            |
| <i>Agonimia sp.</i>              |                           | —                        | —                                       | DQ782913                               | DQ782885 |          | DQ782874   |              |
| <i>Agyrium rufum</i>             | Wedin 7931 (UPS)          | JX000097                 | EF581823                                | EF581826                               | —        | EF581822 | —          | GU980988     |
| <i>Alectoria ochroleuca</i>      |                           | HQ650597                 | DQ986785                                | DQ986801                               | DQ983483 | DQ986857 | —          | —            |
| <i>Alectoria sarmentosa</i>      |                           | DQ979998                 | —                                       | DQ899291                               | AF140233 | DQ899290 | —          | JN009675     |
| <i>Anaptychia palmatula</i>      |                           | HQ650702                 | DQ912286                                | DQ883801                               | DQ883792 | DQ883744 | —          | —            |
| <i>Anisomeridium polyperi</i>    |                           | DQ782838                 | —                                       | DQ782906                               | DQ782877 | —        | DQ782864   | —            |
| <i>Anzia colpodes</i>            |                           | DQ980000                 | —                                       | DQ923651                               | DQ923622 | —        | —          | —            |
| <i>Arachniotus littoralis</i>    |                           | AB566293                 | FJ225784                                | FJ358272                               | FJ358340 | FJ358404 | —          | —            |
| <i>Ascobolus crenulatus</i>      | F9477 (S)                 | DQ491504                 | —                                       | AY544678                               | AY544721 | DQ471132 | —          | JX000149     |
| <i>Aspergillus fumigatus</i>     |                           | FJ878717                 | —                                       | AY660917                               | AB008401 | —        | XM741647   |              |
| <i>Aspicilia caesiocinerea</i>   |                           | HQ650636                 | DQ780271                                | DQ780303                               | DQ986736 | DQ870931 | —          | GQ272390     |
| <i>Aspicilia cinerea</i>         |                           | HQ650637                 | DQ780272                                | DQ780304                               | DQ986735 | DQ870932 | —          | GQ272391     |
| <i>Aleuria aurantia</i>          |                           | MH225453                 | —                                       | AY544654                               | AY544698 |          | DQ247785   |              |
| <i>Baeomyces rufus</i>           | F178482 (S)               | AF448457                 | DQ871016                                | JX000080                               | AF113718 | DQ870937 | —          | JX000150     |
| <i>Botryotinia fuckeliana</i>    |                           | DQ491491                 | AY544732                                | AY544651                               | AY544695 | DQ471116 | DQ247786   | XM_001556412 |
| <i>Buellia aethalea</i>          | F138222 (S)               | JX000098                 | JX000115                                | JX000081                               | —        | JX000133 | —          | JX000151     |
| <i>Buellia disciformis</i>       | Westberg 10-002 (S)       | AY143392                 | JX000116                                | JX000082                               | AF241543 | —        | —          | JX000152     |
| <i>Bryoglossum gracile</i>       |                           | AY789421                 | —                                       | AY789420                               | —        | —        | —          | —            |
| <i>Caliciopsis orientalis</i>    |                           | —                        | FJ190654                                | DQ470987                               | DQ471039 | DQ471185 | —          | —            |
| <i>Calicium viride</i>           | M. Prieto 3015 (S)        | HQ650703                 | AY584696                                | AY340538                               | —        | —        | —          | JX000153     |
| <i>Calicium salicinum</i>        |                           | AY453645                 | —                                       | KF157982                               | KF157970 | —        | KF157998   |              |
| <i>Calycidium cuneatum</i>       | Wedin 8034 (S)            | JX000114                 | JX000117                                | JX000083                               | —        | JX000134 | —          | JX000154     |
| <i>Candelaria concolor</i>       |                           | AF182075                 | EF436460                                | DQ986791                               | —        | —        | DQ992419   | —            |
| <i>Candelariella aurella</i>     | Hermansson 10056 (UPS)    | EF535163                 | AY853313                                | AY853361                               | —        | DQ915594 | —          | JX000155     |
| <i>Candelariella reflexa</i>     |                           | EF535189                 | —                                       | DQ912331<br>AFTOL-ID 1271              | DQ912309 | —        | DQ912380   | —            |
| <i>Candelariella terrigena</i>   |                           | HQ650602                 | —                                       | DQ986745<br>AFTOL-ID 227               | DQ986730 | —        | DQ992427   | —            |
| <i>Candida albicans</i>          |                           | JN606311                 | AACQ01000290<br>REGION: 9209..<br>10587 | AACQ01000290<br>REGION: 7072..<br>8646 | —        | —        | XM713346   | —            |
| <i>Canoparmelia caroliniana</i>  |                           | KY929409                 | —                                       | AY584634                               | AY584658 | —        | AY584683   | —            |
| <i>Capnodium coffeae</i>         |                           | DQ491515                 | FJ190609                                | GU214400                               | DQ247808 | DQ471162 | DQ247788   | —            |
| <i>Capronia munkii</i>           |                           | AF050250                 | FJ225723                                | EF413604                               | EF413603 | EF413605 | —          | —            |
| <i>Capronia pilosella</i>        |                           | DQ826737                 | —                                       | DQ823099                               | DQ823106 | —        | DQ840561   | —            |
| <i>Catapyrenium daedaleum</i>    | M. Prieto 3051 (S)        | JX000099                 | JX000118                                | EF643748                               | EF689830 | EF689748 | —          | JX000156     |
| <i>Curvularia brachyspora</i>    |                           | MG250426                 | —                                       | AF279380                               | L36995.1 | —        | AF107803.1 | —            |
| <i>Chaenotheca brachypoda</i>    | M. Prieto 3023 (S)        | AF297963                 | JX000122                                | JX000086                               | —        | JX000135 | —          | —            |
| <i>Chaenotheca furfuracea</i>    | Wedin 6366 (UPS)          | JX000101                 | JX000121                                | JX000087                               | JX000068 | JX000137 | —          | JX000158     |
| <i>Chaenotheca gracilentia</i>   | Wedin 7022 (S)            | JX000100                 | JX000119                                | JX000084                               | JX000067 | —        | —          | JX000157     |
| <i>Chaenotheca trichialis</i>    | M. Prieto 3028 (S)        | JX000102                 | JX000120                                | JX000085                               | JX000069 | JX000136 | —          | JX000159     |
| <i>Chaenothecopsis viridalba</i> | Wedin 6728 (UPS)          | JX000103                 | AY853317                                | AY853365                               | —        | —        | —          | JX000160     |

|                                    |                      |                       |          |          |          |          |                                            |          |
|------------------------------------|----------------------|-----------------------|----------|----------|----------|----------|--------------------------------------------|----------|
| <i>Chaetomium globosum</i>         |                      | AY429056              | —        | AY545729 | AY545725 | —        | AAFU01001128<br>REGION: 238<br>.. 2979     | —        |
| <i>Cheilymenia stercorea</i>       |                      | MH930238              | —        | AY544661 | AY544705 | —        | AY544733                                   | —        |
| <i>Chlorenchocleia</i> sp.         | ZW-Geo55-Clark       | AY789352              | —        | AY789351 | —        | —        | —                                          | —        |
| <i>Chromocleista malachitea</i>    |                      | —                     | FJ225777 | FJ358281 | FJ358346 | FJ358409 | —                                          | —        |
| <i>Ciboria batschiana</i>          |                      | AY526234              | —        | AY789322 | —        | —        | —                                          | —        |
| <i>Cladonia caroliniana</i>        |                      | MK179649              | —        | AY584640 | AY584664 | —        | AY584684                                   | —        |
| <i>Coccomyces dentatus</i>         |                      | KF797433              | —        | AY544657 | AY544701 | —        | DQ247789                                   | —        |
| <i>Coccotrema cucurbitula</i>      |                      | AF329162              | AF329161 | AF274092 | AF274114 | DQ870939 | —                                          | GU980990 |
| <i>Coccotrema pocillarium</i>      |                      | AF329167              | AF329166 | AF274093 | AF274113 | DQ870940 | —                                          | GU980992 |
| <i>Cochliobolus heterostrophus</i> |                      | —                     | —        | AY544645 | AY544727 | —        | DQ247790                                   | —        |
| <i>Coprinus comatus</i>            |                      | JQ901444              | —        | AY635772 | AY665772 | —        | AY780934                                   | —        |
| <i>Coprinopsis cinerea</i>         |                      | FJ904826              | —        | AF041494 | M92991   | —        | AACS01000026                               | —        |
| <i>Chromocleista malachitea</i>    |                      | —                     | FJ225777 | FJ358281 | FJ358346 | FJ358409 | —                                          | —        |
| <i>Cudonia lutea</i>               | WZ164                | AF433149              | —        | KC833187 | —        | —        | —                                          | —        |
| <i>Cudoniella clavus</i>           |                      | AY789374              | —        | AY789373 | —        | —        | —                                          | —        |
| <i>Cudoniella</i> sp.              | ZW 0068              | AY789342              | —        | AY789341 | —        | —        | —                                          | —        |
| <i>Cudoniella clavus</i>           |                      | JQ256415/<br>AY789374 | —        | DQ470944 | DQ470992 | —        | DQ470888                                   | —        |
| <i>Cyphelium inquinans</i>         | M. Prieto 3008 (S)   | AY450583/AY1433<br>95 | AY143404 | AY453639 | U86695   | —        | —                                          | JX000161 |
| <i>Cyphelium tigillare</i>         | M. Prieto 3038 (S)   | JX000104              | JX000123 | JX000088 | AF241545 | —        | —                                          | JX000162 |
| <i>Dendrographa minor</i>          |                      | DQ842015              | —        | AF279382 | AF279381 | —        | AY641034                                   | —        |
| <i>Dermatocarpon minutum</i>       |                      | MF521951              | —        | AY584644 | AY584668 | —        | DQ782863                                   | —        |
| <i>Dermea acerina</i>              |                      | MH855942              | —        | DQ247801 | DQ247809 | —        | DQ247791                                   | —        |
| <i>Diploschistes ocellatus</i>     |                      | AF228316              | —        | AY605077 | AF038877 | —        | DQ366253                                   | —        |
| <i>Diaporthe eres</i>              |                      | MK024710              | —        | AF408350 | DQ471015 | —        | DQ470919                                   | —        |
| <i>Dibaeis baemyces</i>            |                      | DQ782844              | AY300883 | AF279385 | —        | DQ842011 | AY641037                                   | —        |
| <i>Diploschistes scruposus</i>     | F178255 (S)          | HQ650716              | AY584692 | AF279389 | AF279388 | DQ870943 | —                                          | JX000163 |
| <i>Disciotis</i> sp.               |                      | AJ544207              | —        | AY544667 | AY544711 | —        | DQ470892                                   | —        |
| <i>Disciotis venosa</i>            | F12784 (S)           | DQ491503              | JX000124 | AY544667 | AY544711 | DQ471131 | —                                          | —        |
| <i>Dothidea insculpta</i>          |                      | AF027764              | FJ190602 | DQ247802 | DQ247810 | DQ471154 | DQ247792                                   | —        |
| <i>Dothidea sambuci</i>            |                      | AY883094              | —        | AY544681 | AY544722 | —        | DQ522854                                   | —        |
| <i>Eupenicillium javanicum</i>     |                      | GU981614              | FJ225778 | EF413621 | EF413620 | —        | —                                          | —        |
| <i>Endocarpon pallidulum</i>       |                      | HM237334              | —        | DQ823097 | DQ823104 | —        | DQ840559                                   | —        |
| <i>Exophiala dermatitidis</i>      |                      | KU664383              | —        | DQ823100 | DQ823107 | —        | DQ840562                                   | —        |
| <i>Exophiala nigra</i>             |                      | EF551550              | FJ225742 | FJ358244 | FJ358312 | FJ358375 | —                                          | —        |
| <i>Exophiala pisciphila</i>        |                      | KC354799              | —        | DQ823101 | DQ823108 | —        | DQ840563                                   | —        |
| <i>Fabrella tsugae</i>             |                      | —                     | —        | AF356694 | —        | —        | —                                          | —        |
| <i>Fusarium graminearum</i>        |                      | JX162395              | —        | AY188924 | —        | —        | AACM01000132<br>REGION:<br>154552.. 157390 | v        |
| <i>Geoglossum nigratum</i>         |                      | DQ491490              | AY544740 | AY544650 | AY544694 | DQ471115 | DQ470879                                   | —        |
| <i>Gnomonia gnomon</i>             |                      | AY818957              | —        | AF408361 | DQ471019 | —        | DQ470922                                   | —        |
| <i>Graphis scripta</i>             | Wedin 6476<br>(UPS)  | AF229195              | AY853322 | AY853370 | AF038878 | DQ870947 | —                                          | JX000164 |
| <i>Gyalecta ulmi</i>               | L67816 (S)           | HQ650713              | AY300888 | AF465463 | AF088237 | JX000138 | —                                          | JX000165 |
| <i>Gyromitra californica</i>       |                      | EU837204              | —        | AY544673 | AY544717 | —        | DQ470891                                   | —        |
| <i>Helvella compressa</i>          |                      | KU739801              | —        | AY544655 | AY544699 | —        | DQ497613                                   | —        |
| <i>Heterodermia speciosa</i>       | Wetmore 88030<br>(S) | JX000105              | JX000125 | JX000089 | —        | —        | —                                          | JX000166 |
| <i>Heyderia abietis</i>            | OSC60392             | AY789290              | —        | AY789289 | —        | —        | —                                          | —        |
| <i>Heyderia abietis</i>            | HMAS71954            | AY789297              | —        | AY789296 | —        | —        | —                                          | —        |

|                                                                |                     |           |           |                       |           |          |           |          |
|----------------------------------------------------------------|---------------------|-----------|-----------|-----------------------|-----------|----------|-----------|----------|
| <i>Histoplasma capsulatum</i>                                  |                     | AF 129547 | —         | —                     | —         | —        | —         | —        |
| <i>Holwaya mucida</i>                                          |                     | DQ257357  | —         | DQ257356              | —         | —        | —         | —        |
| <i>Hymenoscyphus scutula</i>                                   |                     | AY789432  | —         | AY789431              | —         | —        | —         | —        |
| <i>Hypocnemomyce scalaris</i>                                  | Wedin 7008 (UPS)    | HQ650632  | AY853325  | AY853373/<br>DQ986748 | DQ782886  | DQ915596 | DQ782875  | JX000167 |
| <i>Icmadophila ericetorum</i>                                  |                     | —         | DQ986897  | DQ883694              | DQ883704  | DQ883723 | —         | —        |
| <i>Lachnum virgineum</i>                                       |                     | MH857308  | —         | AY544646              | AY544688  | —        | DQ470877  | —        |
| <i>Lecanactis abietina</i>                                     |                     | AY548804  | AY548813  | AY548812              | AY548805  | GU561850 | —         | —        |
| <i>Lecanora paramerae</i>                                      |                     | EF 105413 | EF 105418 | EF 105422             | —         | DQ870950 | —         | —        |
| <i>Lecidea fuscoatra</i>                                       |                     | HQ650707  | DQ912275  | DQ912332              | DQ912310  | DQ912355 | —         | —        |
| <i>Lecidea silaceae</i>                                        |                     | HQ650629  | DQ986878  | AY756340              | DQ986723  | DQ986820 | —         | —        |
| <i>Lempholemma polyanthes</i>                                  | M. Prieto 3052 (S)  | JX000106  | —         | JX000090              | AF356690  | —        | —         | JX000168 |
| <i>Leotia lubrica</i>                                          |                     | AY144561  | —         | AY544644              | AY544687  | —        | DQ470876  | —        |
| <i>Lepraria lobificans</i>                                     |                     | HQ650623  | DQ986887  | DQ986768              | DQ986733  | DQ986837 | —         | —        |
| <i>Leptogium lichenoides</i>                                   |                     | HQ650672  | DQ923120  | DQ917412              | DQ917413  | DQ917414 | —         | —        |
| <i>Lobaria pulmonaria</i>                                      | Wedin 6167 (UPS)    | HM448799  | AY340504  | AY340548              | AF 183935 | DQ915591 | —         | JX000169 |
| <i>Lobothallia radiosa</i>                                     |                     | JF 703124 | DQ780274  | DQ780306              | —         | DQ870954 | —         | GQ272397 |
| <i>Magnaporthe grisea</i>                                      |                     | KM484885  | —         | AB026819              | AB026819  | —        | XM362269  | —        |
| <i>Microcalicium ahneri</i>                                    | Wedin 12/6 2011 (S) | JX000108  | JX000126  | —                     | JX000070  | JX000139 | —         | JX000170 |
| <i>Microglossum</i> sp.                                        | PDD70355            | DQ257363  | —         | —                     | —         | —        | —         | —        |
| <i>Mollisia cinerea</i>                                        | M. Prieto 3055 (S)  | DQ491498  | DQ976372  | DQ470942              | DQ470990  | FJ238440 | DQ470883  | JX000172 |
| <i>Monascus purpureus</i>                                      |                     | DQ782847  | FJ225780  | DQ782908              | DQ782881  | DQ842012 | —         | —        |
| <i>Morchella aff. esculenta</i>                                |                     | AB509785  | —         | AY544664              | AY544708  | —        | DQ470880  | —        |
| <i>Monilia fruticicola</i>                                     |                     | KY038837  | —         | AY544670              | AY544714  | —        | DQ470889  | —        |
| <i>Mycoblastus sanguinarius</i>                                |                     | JF744960  | —         | DQ782915              | DQ782879  | —        | DQ782867  | —        |
| <i>Mycocalicium subtile</i>                                    | Wedin 8492 (S)      | AF225445  | AY853330  | AY853379              | JX000072  | JX000141 | —         | JX000173 |
| <i>Nectria cinnabarina</i>                                     | F118002 (S)         | HM484710  | FJ713622  | AF 193237             | JX000073  | GQ506027 | —         | JX000174 |
| <i>Neofabraea alba</i>                                         |                     | AY359236  | —         | AY064705              | —         | —        | —         | —        |
| <i>Neofabraea malicorticis</i>                                 |                     | AF281386  | —         | AY544662              | —         | —        | —         | —        |
| <i>Neurospora crassa</i>                                       |                     | KF040479  | —         | AF286411              | X04971    | —        | XM952013  | —        |
| <i>Orbilina vinosa</i>                                         |                     | DQ491511  | —         | DQ470952              | DQ471000  | —        | —         | —        |
| <i>Orbilina auricolor</i>                                      |                     | DQ656611  | —         | DQ470953              | DQ471001  | —        | DQ470903  | —        |
| <i>Ochrolechia parella</i>                                     |                     | AF332123  | GU980977  | AF274097              | AF274109  | DQ870959 | —         | GQ272421 |
| <i>Ombrophila violacea</i>                                     |                     | AY789366  | —         | AY789365              | —         | —        | —         | —        |
| <i>Onygena corvina</i>                                         |                     | —         | FJ225792  | FJ358287              | FJ358352  | FJ358414 | —         | —        |
| <i>Ophioparma lapponica</i>                                    |                     | KF360414  | —         | DQ973028              | —         | —        | —         | —        |
| <i>Ophioparma ventosa</i>                                      |                     | KF360415  | —         | KF360474/<br>KJ766611 | —         | —        | —         | —        |
| <i>Orceolina kerguelensis</i><br><i>Orceolina kerguelensis</i> |                     | AY212814  | —         | AY212830              | DQ366257  | —        | DQ3662560 | —        |
| <i>Parmelia saxatilis</i>                                      | Wedin 7091 (UPS)    | AF058037  | AY340514  | AY300849              | AF 117985 | DQ923695 | —         | JX000175 |
| <i>Parmelia sulcata</i>                                        |                     | GU994574  | GU994669  | GU994621              | —         | EF092135 | —         | —        |
| <i>Peltigera aphthosa</i>                                      | Wedin 6164 (UPS)    | AF158645  | AY340515  | AF286759              | AY424225  | DQ915598 | —         | JX000176 |
| <i>Peltigera degenii</i>                                       |                     | MH758420  | —         | AY584657              | AY584681  | —        | AY584688  | —        |
| <i>Peltula auriculata</i>                                      |                     | DQ832329  | DQ922953  | DQ832330              | DQ832332  | DQ782856 | —         | —        |
| <i>Peltula umbilicata</i>                                      |                     | DQ832333  | DQ922954  | DQ832334              | DQ782887  | DQ782855 | —         | —        |
| <i>Pertusaria amara</i>                                        |                     | HQ650677  | AY300900  | AF274101              | AF356682  | DQ870965 | —         | GQ272423 |
| <i>Pertusaria corallina</i>                                    | F178261 (S)         | FR799261  | AY300901  | AY300850              | JX000074  | DQ870967 | —         | GU980997 |
| <i>Pertusaria dactylina</i>                                    |                     | DQ782843  | —         | DQ782907              | DQ782880  | —        | DQ782868  | —        |
| <i>Pertusaria hemisphaerica</i>                                |                     | HQ650676  | DQ973000  | AF381556              | DQ902340  | DQ902341 | —         | GU980998 |
| <i>Pertusaria pertusa</i>                                      |                     | AF332127  | AF381565  | AF279300              | AY779282  | DQ870978 | —         | —        |
| <i>Pertusaria scaberula</i>                                    |                     | —         | AF431959  | AF274099              | AF274105  | DQ870980 | —         | GU981003 |
| <i>Pertusaria velata</i>                                       | F76497 (S)          | JX000109  | GU980981  | AY300855              | JX000075  | DQ870982 | —         | GU981005 |

|                                        |                    |            |              |                              |              |             |             |              |
|----------------------------------------|--------------------|------------|--------------|------------------------------|--------------|-------------|-------------|--------------|
| <i>Peziza proteana f. sparassoides</i> |                    | JF908566   | —            | AY544659                     | AY544703     | —           | —           | —            |
| <i>Peziza arvernensis</i>              |                    | KP125489   | —            | AF133162                     | —            | —           | —           | —            |
| <i>Peziza varia</i>                    |                    | JF908557   | —            | MG871335                     | —            | —           | —           | —            |
| <i>Peziza vesiculosa</i>               |                    | JF908568   | —            | DQ470948                     | DQ470995     | —           | DQ470898    | —            |
| <i>Pneumocystis carinii</i>            |                    | KY197742   | —            | AF047831                     | S83267.1     | —           | AY485631    | —            |
| <i>Phialocephala helvetica</i>         |                    | AY347413   | —            | —                            | —            | —           | —           | —            |
| <i>Phylliscum demangeonii</i>          | Wedin 7241 (UPS)   | JX000110   | AY853333     | AY853382                     | —            | JX000142    | —           | JX000177     |
| <i>Phyllopsora sp.</i>                 |                    | MG926004   | —            | KF157990                     | KF157978     | —           | KF158005    | —            |
| <i>Physcia aipolia</i>                 |                    | EU682185   | —            | DQ782904                     | DQ782876     | —           | DQ782862    | —            |
| <i>Placopsis contortuplicata</i>       |                    | DQ534479   | —            | EF489925                     | —            | —           | —           | —            |
| <i>Placopsis gelida</i>                |                    | AF274084   | —            | AY212836                     | —            | —           | —           | —            |
| <i>Placynthiella icmalea</i>           |                    | AF274082   | —            | EU940160                     | —            | —           | —           | —            |
| <i>Pleopsidium chlorophanum</i>        | M. Prieto 3056 (S) | EU870691   | DQ991756     | DQ842017                     | AY316151     | DQ782858    | —           | JX000178     |
| <i>Pleopsidium gobiense</i>            |                    | HQ650723   | DQ991755     | DQ883698                     | DQ525552     | DQ883746    | —           | —            |
| <i>Pleospora herbarum</i>              |                    | AB938190   | —            | DQ247804                     | DQ247812     | —           | DQ247794    | —            |
| <i>Protomyces inouyei</i>              |                    | MK045398   | —            | AY548294                     | AY548295     | —           | AY548299    | —            |
| <i>Podospora anserina</i>              |                    | MF380264   | —            | —                            | —            | —           | —           | —            |
| <i>Potebniamyces pyri</i>              |                    | EU156058   | —            | DQ470949                     | DQ470997     | —           | DQ470900    | —            |
| <i>Pseudevernia furfuracea</i>         |                    | AY611112   | AY611169     | AY607826                     | AY548817     | DQ870990    | —           | —            |
| <i>Pycnora praestabilis</i>            |                    | KF360399   | —            | KJ766644                     | —            | —           | —           | —            |
| <i>Pycnora sorophora</i>               |                    | KF360406   | —            | AY853387                     | MH468790     | —           | MH468793    | —            |
| <i>Pycnora xanthococca</i>             |                    | KF360412   | —            | KF360472                     | —            | —           | —           | —            |
| <i>Pyrenula pseudobufonia</i>          |                    | DQ782845   | AY584720     | AY640962                     | AY641001     | DQ840558    | —           | —            |
| <i>Pyrgillus javanicus</i>             |                    | DQ826741   | FJ225774     | DQ823103                     | DQ823110     | DQ842010    | DQ842009    | XM_001586126 |
| <i>Pyronema domesticum</i>             |                    | MH758709   | —            | DQ247805                     | DQ247813     | —           | DQ247795    | —            |
| <i>Pyrenophora phaeocomes</i>          |                    | DQ491507   | —            | DQ499596                     | DQ499595     | —           | DQ497614    | —            |
| <i>Pyxine soredata</i>                 | Wetmore 91254 (S)  | JX000111   | JX000129     | JX000093                     | —            | —           | —           | JX000179     |
| <i>Ramalina complanata</i>             |                    | HQ650720   | DQ972986     | DQ973038                     | DQ883784     | DQ973059    | —           | —            |
| <i>Rhinocladiella anceps</i>           |                    | AY163559   | —            | DQ823102                     | DQ823109     | —           | DQ840564    | —            |
| <i>Rhytisma salicimum</i>              |                    | AY465516   | —            | HM140566                     | —            | —           | —           | —            |
| <i>Rimularia limborina</i>             |                    | KJ462273   | —            | KJ462349                     | —            | —           | —           | —            |
| <i>Saccharomyces cerevisiae</i>        |                    | KC542799   | —            | U53879 REGION: 24144.. 25525 | Z75578       | —           | Z75059      | —            |
| <i>Sarcoscypha coccinea</i>            |                    | KU973865   | —            | AY544647                     | AY544691     | —           | DQ497612    | —            |
|                                        |                    | <b>ITS</b> | <b>mtSSU</b> | <b>nuLSU</b>                 | <b>nuSSU</b> | <b>RPB1</b> | <b>RPB2</b> | <b>MCM7</b>  |
| <i>Sarea difformis s.l.</i>            | CB093 (H)          | MN938392   | —            | MN938400                     | —            | —           | —           | —            |
| <i>Sarea difformis s.l.</i>            | JR6451 (H)         | MN938393   | MN938398     | MN938401                     | MT028543     | —           | MN938406    | —            |
| <i>Sarea difformis s.l.</i>            | CBS 379.59         | MH857896   | —            | MH867108                     | —            | —           | —           | —            |
| <i>Sarea resinae s.l.</i>              | CB094 (H)          | MN938395   | —            | MN938403                     | —            | —           | —           | —            |
| <i>Sarea resinae s.l.</i>              | JR6450 (H)         | MN938394   | MN938399     | MN938402                     | MT028544     | —           | MN938407    | MN938409     |
| <i>Sarea resinae s.l.</i>              | CBS 428.52         | MH857111   | —            | MH869439                     | —            | —           | —           | —            |
| <i>Sarea resinae s.l.</i>              | CBS 441.34         | MH855597   | —            | MH867108                     | —            | —           | —           | —            |
| <i>Sarea resinae s.l.</i>              | PDD 117345         | MN938397   | —            | MN938405                     | MT028545     | —           | —           | —            |
| <i>Sarea resinae s.l.</i>              | PDD 117343 Abies   | MN938396   | —            | MN938404                     | MT028546     | —           | MN938408    | —            |
| <i>Simonyella variegata</i>            |                    | DQ782835   | —            | AY584645                     | AY584669     | —           | DQ782861    | —            |
| <i>Schistophoron tenue</i>             | L64691 (S)         | JX000112   | EU544933     | EU544932                     | —            | —           | —           | JX000181     |
| <i>Schizoxylon albescens</i>           | Wedin 8365 (S)     | HQ287353   | DQ401142     | DQ401144                     | JX000077     | JX000143    | —           | JX000182     |
| <i>Schizoxylon albescens</i>           |                    | JX000077   | —            | —                            | —            | —           | —           | —            |
| <i>Scleromitrla shiraiana</i>          |                    | AY789408   | —            | AY789407                     | —            | —           | —           | —            |
| <i>Sclerophora farinacea</i>           | Wedin 6414 (UPS)   | JX000113   | JX000130     | JX000095                     | JX000078     | JX000144    | —           | JX000183     |
| <i>Sclerotinia sclerotiorum</i>        |                    | AF455526   | —            | AY789347                     | —            | —           | —           | —            |

|                                    |                     |           |          |           |           |          |          |          |
|------------------------------------|---------------------|-----------|----------|-----------|-----------|----------|----------|----------|
| <i>Scutellinia scutellata</i>      |                     | FJ235141  | —        | DQ247806  | DQ247814  | —        | DQ247796 |          |
| <i>Sphaerophorus globosus</i>      | Stenroos 5539 (TUR) | HQ650622  | DQ986866 | DQ986767  | AF117983  | DQ986836 | —        | JX000185 |
| <i>Spathularia flavida</i>         | WZ 214              | —         | —        | MH868630  | —         | —        | —        | —        |
| <i>Sphinctrina turbinata</i>       |                     | AY795877  | FJ71361  | EF413632  | EF413631  | —        | —        | —        |
| <i>Spiromastix warcupii</i>        |                     | DQ782848  | FJ225794 | DQ782909  | DQ782882  | EF413613 | DQ782870 | —        |
| <i>Sordaria fimicola</i>           |                     | KY930619  | —        | AY545728  | AY545724  | —        | —        | —        |
| <i>Staurothele frustulenta</i>     |                     | KC990385  | —        | DQ823098  | DQ823105  | —        | DQ840560 | —        |
| <i>Stictis radiata</i>             |                     | MH578520  | —        | AF356663  | U20610    | —        | AY641079 | —        |
| <i>Symbiotaphrina lignicola</i>    | CBS 325.93          | MH862405  | —        | NG_057675 | —         | —        | —        | —        |
| <i>Symbiotaphrina buchneri</i>     |                     | KY105569  | —        | KY109806  | AY227716  | —        | JCM9740  | —        |
| <i>Symbiotaphrina kochii</i>       | AFTOL-ID 1902       | —         | —        | —         | FJ176833  | —        | FJ238443 | —        |
| <i>Symbiotaphrina kochii</i>       | CBS 588.63/589.63   | DQ248314  | —        | —         | U26207    | —        | DQ248316 | —        |
| <i>Symbiotaphrina kochii</i>       | CBS 250.77          | MH861058  | —        | NG_057719 | U26206    | —        | GU397369 | —        |
| <i>Symbiotaphrina kochii</i>       | DC-1-15             | KC215110  | —        | —         | —         | —        | —        | —        |
| <i>Symbiotaphrina kochii</i>       | DC-1-75             | KC215113  | —        | —         | —         | —        | —        | —        |
| <i>Taphrina wiesneri</i>           |                     | AB435051  | —        | AY548292  | AY548293  | —        | AY548298 | —        |
| <i>Thamnotia vermicularis</i>      |                     | AY853345  | AY853395 | —         | AF085472  | —        | —        | —        |
| <i>Trematosphaeria heterospora</i> |                     | GQ203795  | —        | AY016369  | AY016354  | —        | DQ497615 | —        |
| <i>Trapelia involuta</i>           |                     | —         | —        | AF274098  | —         | —        | —        | —        |
| <i>Trapelia placodioides</i>       |                     | AF274081  | AF431962 | AF274103  | AF119500  | DQ366259 | DQ366260 | —        |
| <i>Trapeliopsis flexuosa</i>       |                     | HQ650634  | AY212875 | AF274118  | DQ986709  | DQ871000 | —        | —        |
| <i>Trapeliopsis glaucolepidea</i>  |                     | —         | —        | —         | —         | —        | —        | —        |
| <i>Trapelia placodioides</i>       |                     | —         | —        | KU844623  | —         | —        | —        | —        |
| <i>Trichoglossum hirsutum</i>      | F39542 (S)          | DQ491494  | AY544758 | AY544653  | AY544697  | DQ471119 | —        | JX000188 |
| <i>Roccella fuciformis</i>         |                     | KF036010  | —        | AY584654  | AY584678  | —        | DQ782866 | —        |
| <i>Umbilicaria hyperborea</i>      | Wiklund 25 (UPS)    | AF096216  | AY853349 | AY853399  | —         | DQ915600 | —        | JX000189 |
| <i>Verrucaria muralis</i>          |                     | EU010261  | FJ225708 | EF689878  | EF689878  | EF689805 | —        | GQ272418 |
| <i>Vibrissea albofusca</i>         |                     | AY789384  | —        | AY789383  | —         | —        | —        | —        |
| <i>Vibrissea flavovirens</i>       |                     | AY789427  | —        | AY789426  | —         | —        | —        | —        |
| <i>Vibrissea truncorum</i>         |                     | AY789403  | —        | AY789402  | —         | —        | —        | —        |
| <i>Westerdykella cylindrica</i>    |                     | DQ491519  | —        | AY779322  | AY016355  | —        | DQ470925 | —        |
| <i>Xylographa opegraphella</i>     |                     | —         | —        | KJ462364  | —         | —        | —        | —        |
| <i>Xylona haveae</i>               | CBS 132.468         | MH866027  | —        | MH877475  | —         | —        | —        | —        |
| <i>Xylona heveae</i>               | CBS 132.557         | NR_121539 | —        | MH878330  | NG_061134 | —        | —        | —        |
| <i>Xylona heveae</i>               | TC118               | JQ838233  | —        | —         | —         | —        | —        | —        |
| <i>Xylona heveae</i>               | TC161               | JQ838232  | —        | JQ838238  | JQ838237  | —        | —        | —        |
| <i>Xylona heveae</i>               | TC137               | JQ838234  | —        | JQ838240  | JQ838235  | —        | JQ838245 | —        |
| <i>Xylona heveae</i>               | TC269               | JQ838225  | —        | JQ838236  | JQ838239  | —        | JQ838246 | —        |
| <i>Xylaria acuta</i>               |                     | JQ862676  | —        | AY544676  | AY544719  | —        | DQ247797 | —        |
| <i>Xylaria hypoxylon</i>           | F118002 (S)         | DQ491487  | AY544760 | AY544648  | AY544692  | DQ471114 | DQ470878 | JX000190 |
